# Supplementary material
Source: PubMed Central journal article supplement (PMC7508622)
Supplement: AAC.00851-20-s0001.pdf [file AAC.00851-20-s0001.pdf]

## Supplementary Information

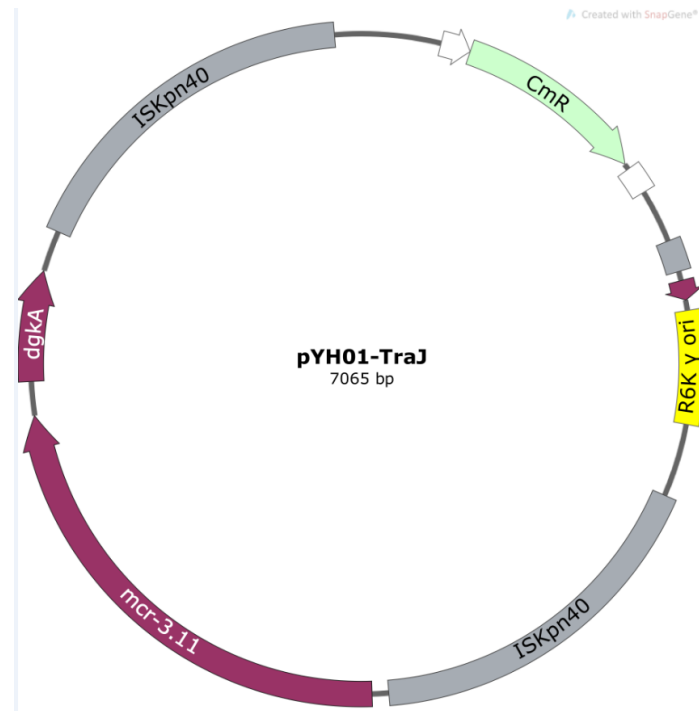

**Figure S1:** The plasmid profile of pYH01-TraJ

**Table S1.** Target site test primers used in this study.

| Target sites | primers | Sequence (5'→3')        |
|--------------|---------|-------------------------|
| NO1          | TF1     | CAGTGTCGAGGGCTTCATCA    |
| NO2          | TF2     | CTCACGTACCTGAGAGTAGTC   |
| NO3          | TF3     | CAAAGCGATGGGAGCAATGA    |
| NO4          | TF4     | TGCTGAATGCGATGAAGCAC    |
| NO5          | TF5     | CGTTGGGTGTAGGAATGACA    |
| NO6          | TF6     | ACGGTTTCCTTGATGAAATCCTC |
| NO7          | TF7     | CGGTTTTGCTGGATTCCGGTT   |
| NO8          | TF8     | GGATCACCACAAAGAACACC    |
| NO9          | TF9     | GACAAAAGGTGCACTCATCC    |
| NO10         | TF10    | TGCGGCTACACTATTTCCCTG   |
| NO11         | TF11    | TATAGCCGCTCACCTGCACA    |
| NO12         | TF12    | CGGATAACGGTATTTCCATGCT  |
| NO13         | TF13    | ACACGGCAACACATCCCATC    |
| NO14         | TF14    | GTCCTGACTGACAGCTCGAA    |
| NO15         | TF15    | GAAGCAGTGGGAAGAAGTG     |
| NO16         | TF16    | CGTCACCAATCACGACACTG    |
| NO17         | TF17    | GGCAGAAGAGCTTAAGGATGT   |
| NO18         | TF18    | GCGAGTGGTGAATGTGTCGA    |
| NO19         | TF19    | GTCAGGTAATCGACTATTCCTG  |
| NO20         | TF20    | CGTATGGCGCTGATCGTTGA    |
| NO21         | TF21    | TTGGTAATTGCCGGGATCATCG  |
| NO22         | TF22    | ATGACGATCAGGGTCGTCTG    |
| NO23         | TF23    | CAGCTTGGCGTTGTTATCTACC  |

**Table S2.** Plasmid construction and AP-PCR primers used in this study

| Primers     | Sequence (5' → 3')                          | Reference  |
|-------------|---------------------------------------------|------------|
| pYH-AfIII   | TACGC <u>CTTAAG</u> CGGTAAGCTAGACAAAACGGA   | This study |
| pYH-BgIII   | TACGC <u>AGATCT</u> TGGTCGGAGATATGGGTGTAG   | This study |
| pJS05-AfIII | TACGC <u>CTTAAG</u> TCTCCGTCTCGAGGTTGATC    | This study |
| pJS05-BgIII | CTCCGACCA <u>AGATCT</u> CCATGTCAG           | This study |
| traJ-1      | TACGC <u>ACTAGTT</u> CGTCTGGAAGGCAGTACACCTT | This study |
| traJ-2      | TACGC <u>GTCGAC</u> CCAGTCGGTAGATATTCCAC    | This study |
| ISKpn40-F1  | AGCCTTAATTGCTCGCTTCG                        | This study |
| ISKpn40-F2  | ATCAGAACGCTCAAGGAGCA                        | This study |
| CTI-3U      | AGTGTGGGGTGCATTGACAG                        | This study |
| MCR3-F      | TGGTCGGAGATATGGGTGTAG                       | This study |
| MCR3-R      | CGGTAAGCTAGACAAAACGGA                       | This study |
| AB1         | GGCCACGCGTCGACTAGTACNNNNNNNNNNACGCC         | AB1        |
| AB2         | GGCCACGCGTCGACTAGTACNNNNNNNNNNCCTGG         | AB2        |
| AB3         | GGCCACGCGTCGACTAGTACNNNNNNNNNNCCTCG         | AB3        |
| ABS         | GGCCACGCGTCGACTAGTAC                        | ABS        |

Restriction sites are underlined.

**Table S3.** The whole genetic structure *ISKpn40-mcr-3.11-dgkA-ISKpn40* in the genome verified primers used in this study

| Target sites | Upstream primers | Sequence (5'→3')        | Downstream primers | Sequence (5'→3')       |
|--------------|------------------|-------------------------|--------------------|------------------------|
| NO1          | trg-F            | CAGTGTCGAGGGCTTCATCA    | trg-R              | G TTCAGCCCGGATCAATATG  |
| NO2          | ybcY-F           | CTCACGTACCTGAGAGTAGTC   | ybcY-R             | CATTCTCGAAATGCTCTGAG   |
| NO 3         | yjfk-F           | CAAAGCGATGGGAGCAATGA    | yjfk-R             | ATATGAAGTGATGTCAGCGG   |
| NO 4         | narQ-F           | TGCTGAATGCGATGAAGCAC    | acrd-R             | AAATGGGGCGATCAATAAAG   |
| NO 5         | ydgJ-F           | CGTTGGGTGTAGGAATGACA    | blr-R              | GACAAGAACGATCCAACCTG   |
| NO 6         | fliZ-F           | ACGGTTTCCTTGATGAAATCCTC | fily-R             | TTAAGCAGACCTTCATCTGC   |
| NO 7         | pagA-F           | CGGTTTTGCTGGATTCGGTT    | pgaa-R             | ATCAGTGAAAGCCCAGGAGA   |
| NO 8         | acrF-F           | GGATCACCAAAAGAACACC     | acrF-R             | G TAGTGCCGTTAGGGATTG   |
| NO 9         | slp-F            | GACAAAAGGTGCACTCATCC    | slp-R              | ATCAAGGAAGCCGCTTTGTC   |
| NO 10        | ygeQ-F           | TGCGGCTACACTATTTCCCTG   | glyu-R             | CCGCTCCAATTTATCTTCGC   |
| NO 11        | aer-F            | TATAGCCGCTCACCTGCACA    | pat-A              | G TTCAAAATATGCTCCGGAG  |
| NO 12        | ydiO-F           | CGGATAACGGTATTTCCATGCT  | ydiO-R             | ACGCGTGTAAGTGGTAGTGG   |
| NO 13        | maa-F            | ACACGGCAACACATCCCATC    | ylac-R             | TAGCAAACGCGGAAATCCAG   |
| NO 14        | yclT-F           | GTCCTGACTGACAGCTCGAA    | osmb-R             | G TCCC GTTTAGACCAGTTAG |
| NO 15        | glf-F            | GAAGCAGTGGGGAAGAAGTG    | glf-R              | G CATTCCCTT GGAAGTTTGG |
| NO 16        | yrdA-F           | CGTCACCAATCACGACTCTG    | rrsd-R             | G AGCCATGATCAA ACTCTTC |
| NO 17        | ugd-F            | GGCAGAAGAGCTTAAGGATGT   | wzzb-R             | G TTATAGCCAGCAATTTGCC  |
| NO 18        | yjbl-F           | ATCAAAGCGAGTGGTGAATGT   | yjbi-R             | C ATAACAGCTGTCAAATTCG  |
| NO 19        | hha-F            | GTCAGGTAATCGACTATTCCGT  | maa-R              | G AGCGATACA ACTCACCAGC |
| NO 20        | upp-F            | CGTATGGCGCTGATCGTTGA    | uraa-R             | G GCGCGTCATAGTATTATCC  |
| NO 21        | yihO-F           | TTGGTAATTGCCGGGATCATCG  | yihO-R             | C GGGAAAAAATCGCCTATGG  |
| NO 22        | yhdV-F           | ATGACGATCAGGGTCGTCTG    | yhdw-R             | A TAATGCTTCCTGTGAGGCG  |
| NO 23        | xylF-F           | CAGCTTGGCGTTGTTATCTACC  | xylf-R             | T GAAGAAACACAAATGTCGC  |
| MCR-3        | MCR-3D           | GGCTATGAGAAAGACACCAATCC | MCR-3U             | A TTGCGAGCGCGATTATCAT  |

**Table S4.** Plasmids and genome sequences bearing *mcr-3* and its variants containing one or more copies of *ISKpn40*, searched in Genbank database.

| Plasmids/<br>Strains            | Size (bp) | Loca<br>tion | Specials                     | Source    | Region      | <i>ISKpn40</i><br>(up) | <i>dgkA</i> | <i>ISKpn40</i><br>(down) | DR        | <i>mcr</i> -<br>type | Acc. No. |
|---------------------------------|-----------|--------------|------------------------------|-----------|-------------|------------------------|-------------|--------------------------|-----------|----------------------|----------|
| pECSC102                        | 60744     | IncP         | <i>Salmonella enterica</i>   | Poultry - | China       | 1                      | 1           | 1                        | ATTT/GAAT | <i>mcr-3.11</i>      | MG552133 |
| pMYKLB95-1                      | 99493     |              | <i>Klebsiella pneumoniae</i> |           | China       | 1                      | 1           | 1                        | AAAT/ATTC | <i>mcr-3.11</i>      | MH341574 |
| Strain KLB38                    |           |              | <i>Klebsiella pneumoniae</i> |           | China       | 1                      | 1           | 1                        | ATTC.AAAT | <i>mcr-3.11</i>      | MK112271 |
| Strain KLB49                    |           |              | <i>Klebsiella pneumoniae</i> |           | China       | 1                      | 1           | 1                        | ATTT/GAAT | <i>mcr-3.11</i>      | MK112272 |
| <b>pVE769</b>                   | 88108     |              | <i>Escherichia coli</i>      | Food      | Vietnam     | 0                      | 1           | 1                        | /CACC     | <i>mcr-3.2</i>       | AP018353 |
| <b>pVE155</b>                   | 87280     |              | <i>Escherichia coli</i>      | Food      | Vietnam     | 0                      | 1           | 1                        | /CACC     | <i>mcr-3.1</i>       | AP018354 |
| <b>pJSWP006</b>                 | 123579    | IncF         | <i>Escherichia coli</i>      |           | Japan       | 1                      | 1           | 1                        | /CACC     | <i>mcr-3.1</i>       | AP018939 |
| <b>GSH8M-1</b>                  | 4611279   |              | <i>Aeromonas caviae</i>      | Plant     | Japan       |                        | 1           |                          |           | <i>mcr-3</i>         | AP019195 |
| <b>ASNIH7</b>                   | 4817060   |              | <i>Aeromonas sp</i>          |           | USA         |                        | 1           |                          |           | <i>mcr-3.18</i>      | CP026226 |
| <b>pMCR3_025943</b>             | 50520     |              | <i>Escherichia coli</i>      |           | China       |                        |             |                          |           | <i>mcr-3.5</i>       | CP027203 |
| <b>17ISAe</b>                   | 4652208   |              | <i>Aeromonas veronii</i>     | Discus    | Korea       |                        | 1           |                          |           | <i>mcr-3</i>         | CP028133 |
| <b>FC951</b>                    | 4666657   |              | <i>Aeromonas veronii</i>     |           | India       |                        | 1           |                          |           | <i>mcr-3.19</i>      | CP032839 |
| <b>pCHL5009T</b>                | 101860    |              | <i>Escherichia coli</i>      |           | New Zealand | 1                      | 1           |                          | /GTTT     | <i>mcr-3.1</i>       | CP032937 |
| <b>pCP53-mcr</b>                | 231859    |              | <i>Escherichia coli</i>      |           | China       |                        | 1           | 1                        | /AAAT     | <i>mcr-3.19</i>      | CP033094 |
| <b><i>Aeromonas veronii</i></b> | 36959     |              | <i>Aeromonas veronii</i>     |           | China       |                        | 1           |                          |           | <i>mcr-3.6</i>       | MH481281 |
| <b>pHS5257MCR3.1</b>            | 7698      |              | <i>Salmonella</i>            |           | Brasil      |                        | 1           | 1                        | /CATT     | <i>mcr-3.1</i>       | MK652761 |
| <b>plasmid pT3</b>              | 79293     |              | <i>Escherichia coli</i>      |           | Switzerland |                        | 1           |                          |           | <i>mcr-3</i>         | MK656937 |
| <b>p08-5333.1</b>               | 178506    |              | <i>Salmonella enterica</i>   |           | Canada      |                        | 1           | 1                        | /GTTT     | <i>MCR-3.1</i>       | CP039562 |
| <b>pWJ1</b>                     | 261119    |              | <i>Escherichia coli</i>      |           | China       |                        | 1           | 1                        | /GAAT     | <i>mcr-3</i>         | KY924928 |
| <b>pMCR3_WCHEC-LL123</b>        | 52208     |              | <i>Escherichia coli</i>      |           | China       |                        | 1           |                          |           | <i>MCR-3.5</i>       | MF489760 |

|                         |        |                            |       |             |   |   |   |           |                 |          |
|-------------------------|--------|----------------------------|-------|-------------|---|---|---|-----------|-----------------|----------|
| <b>strain 172</b>       | 268746 | <i>Aeromonas veronii</i>   |       | China       |   | 1 |   |           | <i>mcr-3</i>    | MF495680 |
| <b>Aeromonas caviae</b> | 26269  | <i>Aeromonas caviae</i>    |       | China       |   |   |   |           | <i>mcr-3.10</i> | MG214531 |
| <b>Escherichia coli</b> | 20376  | <i>Escherichia coli</i>    |       | Brazil      |   | 1 |   |           | <i>mcr-3</i>    | MG491669 |
| <b>pHN8</b>             | 53148  | <i>Escherichia coli</i>    |       | China       | 1 | 1 |   | ATTT/     | <i>mcr-3</i>    | MG780294 |
| <b>p17S-208</b>         | 260339 | <i>Escherichia coli</i>    | Swine | South Korea | 1 | 1 | 1 | TTTA/CACC | <i>mcr-3</i>    | MH077952 |
| <b>p131681</b>          | 201750 | <i>Salmonella enterica</i> |       | Canada      |   | 1 | 1 | /CACC     | <i>mcr-3.2</i>  | MH114596 |

**Table S5.** Insertion sites of IS*Kpn40-mcr-3.11-dgkA-ISKpn40* in the genome of *E. coli* MG1655 (*recA*: :Km).

| Transposition Events | Insertion sites  | Function                                                                                                                                                     |
|----------------------|------------------|--------------------------------------------------------------------------------------------------------------------------------------------------------------|
| NO1                  | <i>trg</i>       | methyl-accepting chemotaxis protein III, ribose and galactose sensor receptor                                                                                |
| NO2                  | <i>ybcy</i>      | pseudogene, DLP12 prophage; methyltransferase homology; Phage or Prophage Related                                                                            |
| NO3                  | <i>yjfK</i>      | conserved protein, DUF2491 family                                                                                                                            |
| NO4                  | <i>narQ/acrD</i> | sensory histidine kinase in two component regulatory system with Nar (NarL)/aminoglycoside; multidrug efflux system                                          |
| NO5                  | <i>ydgJ/blr</i>  | Putative oxidoreductase/betalactam resistance membrane protein; divisome-associated protein                                                                  |
| NO6                  | <i>fliZ/fliY</i> | RpoS antagonist; putative regulator of FlhA activity/cystine transporter subunit                                                                             |
| NO7                  | <i>pgaA</i>      | biofilm adhesin polysaccharide PGA secretin; OM porin; polybeta-1,6-N-acetyl-D                                                                               |
| NO8                  | <i>acrF</i>      | glucosamine export protein                                                                                                                                   |
| NO9                  | <i>slp</i>       | outer membrane lipoprotein                                                                                                                                   |
| NO10                 | <i>ygeQ</i>      | pseudogene                                                                                                                                                   |
| NO11                 | <i>patA/aer</i>  | putrescine:2-oxoglutaric acid aminotransferase, PLPdependent/fused signal transducer for aerotaxis sensory component ; methyl accepting chemotaxis component |
| NO12                 | <i>ydiO</i>      | putative acyl-CoA dehydrogenase                                                                                                                              |
| NO13                 | <i>ylaC</i>      | inner membrane protein, DUF1449 family                                                                                                                       |
| NO14                 | <i>osmB</i>      | lipoprotein                                                                                                                                                  |
| NO15                 | <i>glf</i>       | UDP-galactopyranose mutase, FAD/NAD(P)-binding                                                                                                               |
| NO16                 | <i>yrdA/rrsD</i> | hypothetical protein/16S ribosomal RNA of <i>rrnD</i> operon                                                                                                 |

|      |             |                                                                         |
|------|-------------|-------------------------------------------------------------------------|
| NO17 | <i>wzzB</i> | regulator of length of O-antigen component of lipopolysaccharide chains |
| NO18 | <i>yjbl</i> | pseudogene, pentapeptide repeat-related                                 |
| NO19 | <i>hha</i>  | modulator of gene expression, with H-NS                                 |
| NO20 | <i>upp</i>  | uracil phosphoribosyltransferase                                        |
| NO21 | <i>yihO</i> | putative transporter                                                    |
| NO22 | <i>yhdV</i> | putative outer membrane protein                                         |
| NO23 | <i>xyIF</i> | D-xylose transporter subunit                                            |

---
